# Supplementary material for: Folding mechanisms steer the amyloid fibril formation propensity of highly homologous proteins
Source: Royal Society of Chemistry journal article supplement (doi:10.1039/c8sc00166a), 2018-01-01
Supplement: c8sc00166a1.pdf [file c8sc00166a1.pdf]

## **Folding mechanisms steer amyloid fibrils formation propensity of highly homologous proteins**

Gaetano Malgieri<sup>1</sup>, Gianluca D'Abrosca<sup>1</sup>, Luciano Pirone<sup>2</sup>, Angelo Toto<sup>3</sup>, Maddalena Palmieri<sup>1#</sup>, Luigi Russo<sup>1</sup>, Michele Francesco Maria Sciacca<sup>4</sup>, Rosarita Tatè<sup>5</sup>, Valeria Sivo<sup>1</sup>, Ilaria Baglivo<sup>1</sup>, Roksana Majewska<sup>1§</sup>, Massimo Coletta<sup>6</sup>, Paolo Vincenzo Pedone<sup>1</sup>, Carla Isernia<sup>1</sup>, Mario De Stefano<sup>1</sup>, Stefano Gianni<sup>3</sup>, Emilia Maria Pedone<sup>2</sup>, Danilo Milardi<sup>4\*</sup> and Roberto Fattorusso<sup>1\*</sup>

1: Department of Environmental, Biological and Pharmaceutical Sciences and Technologies, University of Campania "Luigi Vanvitelli", Via Vivaldi 43, 81100 Caserta (Italy).

2: Institute of Biostructures and Bioimaging - CNR, Via Mezzocannone 16, 80134 Naples (Italy).

3: Department of Biochemical Sciences "Alessandro Rossi Fanelli" - University of Rome "La Sapienza", Piazzale Aldo Moro 5, 00185, Roma (Italy).

4: Institute of Biostructures and Bioimaging - CNR, Viale A. Doria 6, 95125 Catania (Italy).

5: Institute of Genetics and Biophysics "Adriano Buzzati-Traverso" - CNR, Via P. Castellino 111, 80131 Napoli (Italy).

6: Department of Clinical Sciences and Translational Medicine, University of Rome "Tor Vergata", Via Montpellier 1, 00133, Roma (Italy).

\*Correspondence: roberto.fattorusso@unicampania.it, dmilardi@unict.it.

Present Addresses:

# Patheon via Morolense 5, 03013 Ferentino (Fr) - Italy.

§ Unit for Environmental Sciences and Management- School of Biological Sciences- North-West University - Private Bag X6001- Potchefstroom- South Africa AND South African Institute for Aquatic Biodiversity (SAIAB) - Private Bag 1015 - Grahamstown 6140- South Africa.

## Supplementary Information

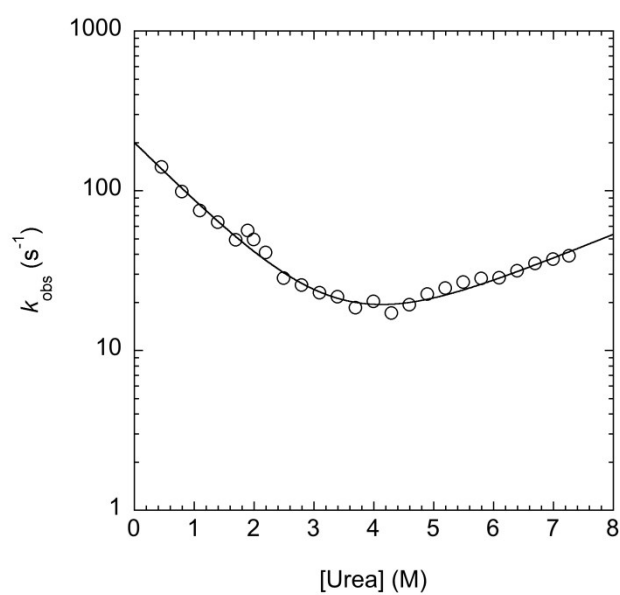

**FIGURE S11** – Chevron plot of M14<sub>52-151</sub> in Urea

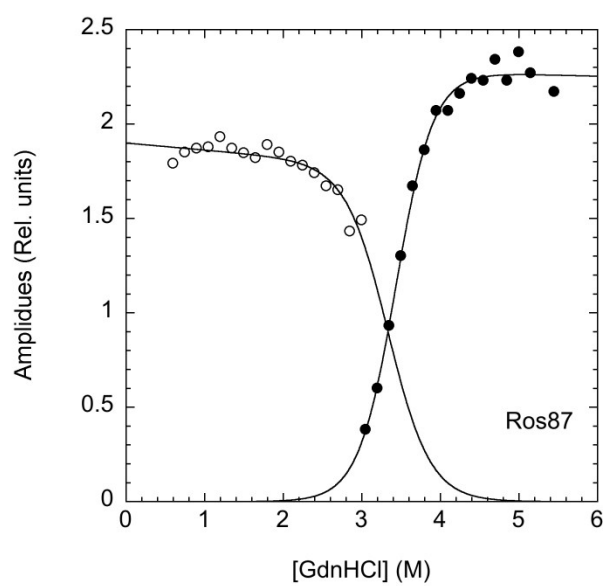

**FIGURE S12** – Folding and unfolding kinetic transitions of Ros87. Open and filled circles refer to the amplitudes of the kinetic traces observed in the kinetic refolding and unfolding experiments respectively.

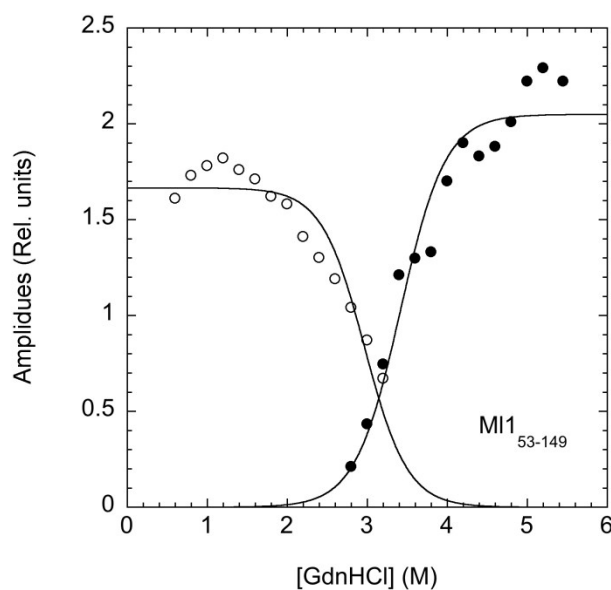

**FIGURE SI3** – Folding and unfolding kinetic transitions of Ml1<sub>53-149</sub>

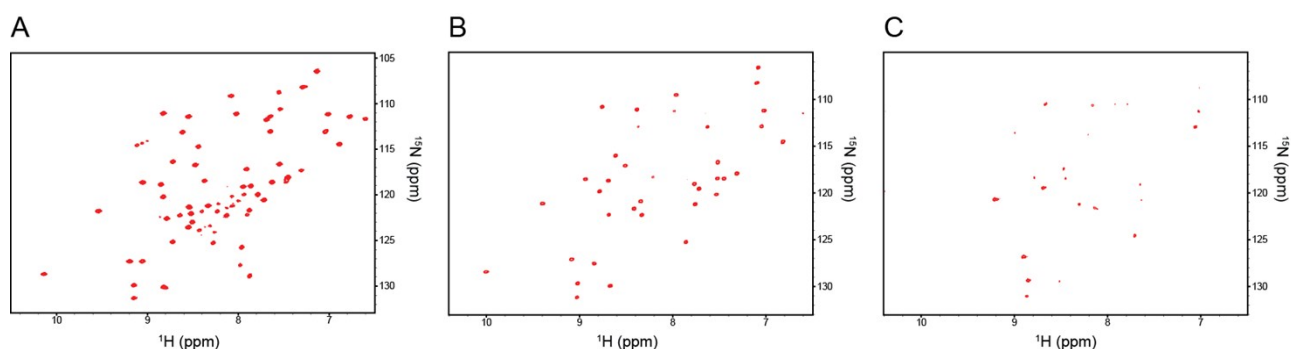

**FIGURE SI4** – Unfolding of Ml1<sub>53-149</sub> by NMR: <sup>1</sup>H-<sup>15</sup>N-HSQC of the protein at 298K (A), 323K (B) and at 353K (C). NMR samples contained 0.8 mM <sup>15</sup>N- Ml1<sub>53-149</sub>, 20 mM phosphate buffer, 0.2 M NaCl, 4 mM TCEP, pH 6.8, and 90% H<sub>2</sub>O/10% <sup>2</sup>H<sub>2</sub>O. The experiments were acquired on a Varian Unity INOVA 500 MHz spectrometer. Temperature-induced chemical shift perturbations have been monitored in a series of <sup>1</sup>H-<sup>15</sup>N HSQC spectra acquired in a range from 278 to 353 K at regular intervals of temperature. The resonances exhibit a continuous chemical shift variation indicating a fast protein folding process and some of them still preserved a good spectral dispersion at 353 K. The presence of visible cross-peaks up to 353 K is in agreement with the mechanism of folding described by the other techniques.

**MI1<sub>53-149</sub>** 1~~~SAAKPE~ALEPA VPIRKSVT**PD YIIC**LDGKK FKSLKRHLST AKWHLPADYP MVAPNYAAAR SALAKTMGLG RKPKEPEART RKKAAA~<sup>97</sup>  
**MI4<sub>52-151</sub>** 1GRPAENP~~VLTPA VNPKKSVF**PD YIVS**LEDGRK FKSMKRHLGL TKWDLPRDYP MVAPNYAATR SALAKASGLG RKAAPVKKAP AKRKAKA<sup>100</sup>  
**Ros87** 1~~~AVNVEKQKPA VSVRKSVQDD **HIVC**LECGGS FKSLKRHLTT EKWDLFVDYP MVAPAYAEAR SRLAKEMGLG QRRKANR~~~<sup>87</sup>

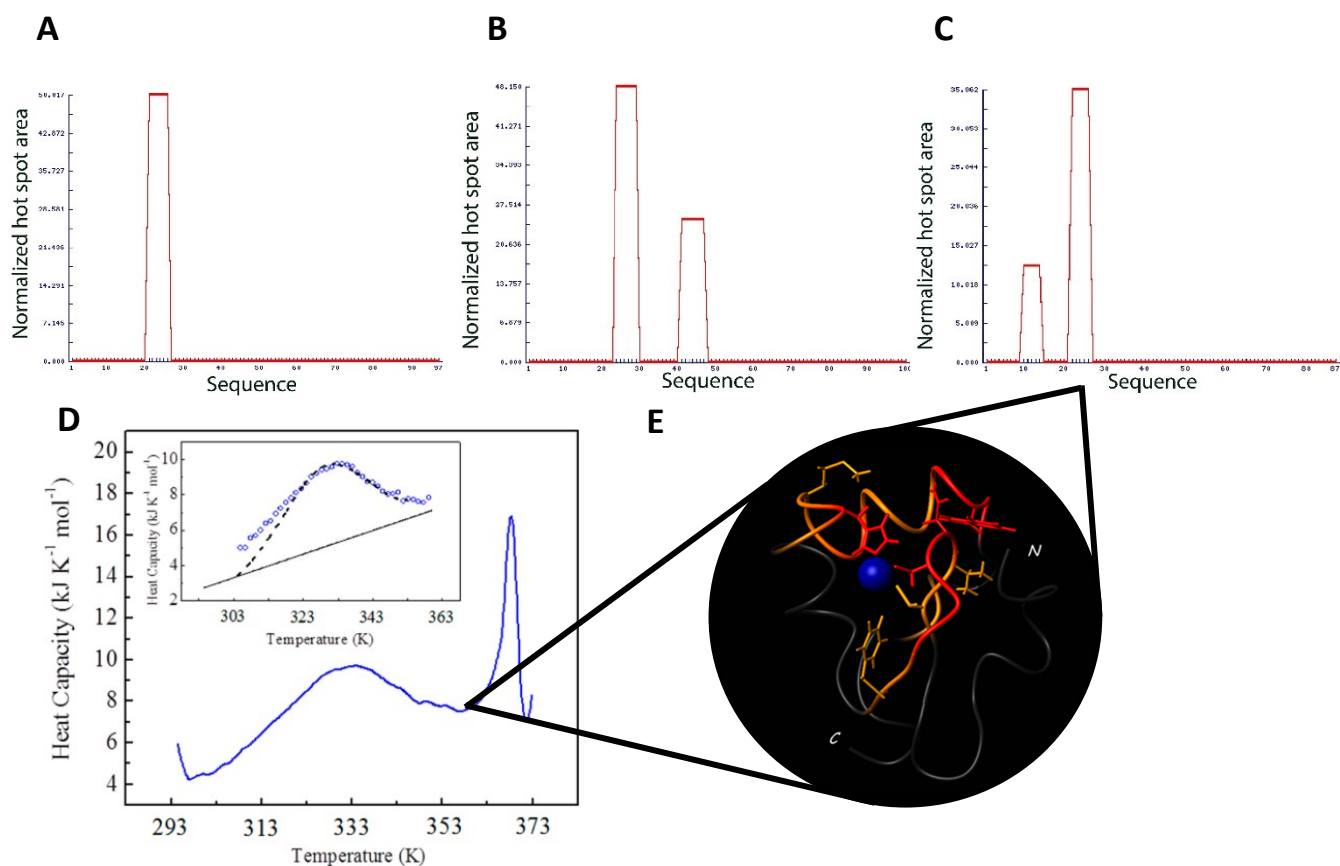

**FIGURE SI5** - Alignment of the three proteins: the amino acid stretches with high propensity to aggregate are in red; AGGRESCAN results for Ros87 (C), MI4<sub>52-151</sub> (B) and MI1<sub>53-149</sub> (A); thermal unfolding of Ros87 followed by DSC (D); Ros87 zinc containing intermediate present at 353K (Palmieri *et al.*, JACS 2013).

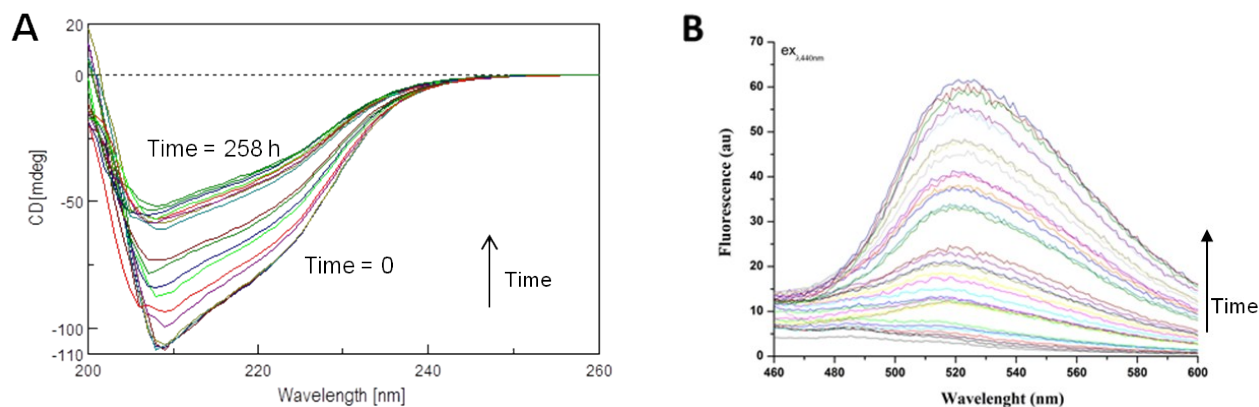

**Figure SI6** - (A) CD spectra of Ros87 incubated at 298K recorded every 12 hours for 10 days. (B) ThT fluorescence assay of Ros87 incubated at 298K: spectra were recorded every 12 hours.

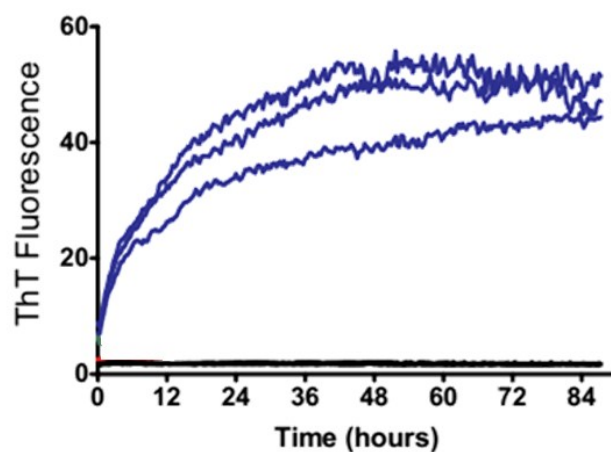

**FIGURE SI7** – Aggregation behavior of unfolded Ros87 in acidic conditions (pH=3) at 298K followed by Thioflavin T fluorescence, recorded as a triplicate.

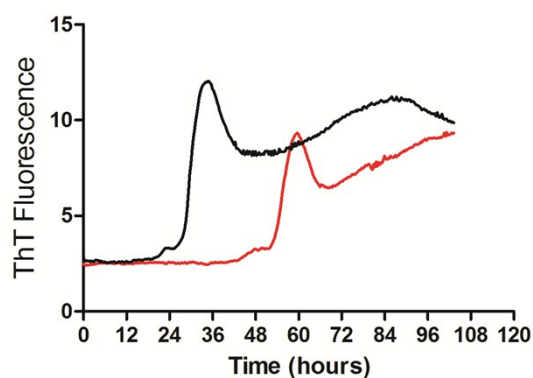

**FIGURE SI8** - Aggregation behavior of Ros87 (black) and MI4<sub>52-151</sub> (red) at 300  $\mu$ M and 298K followed by Thioflavin T fluorescence.

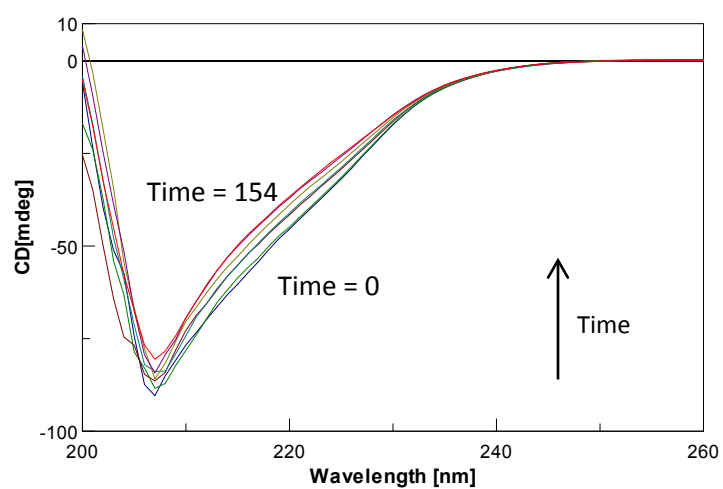

**FIGURE SI9** - CD spectra of MI4<sub>52-151</sub> incubated at 288K recorded every 24 hours for 154 hours.

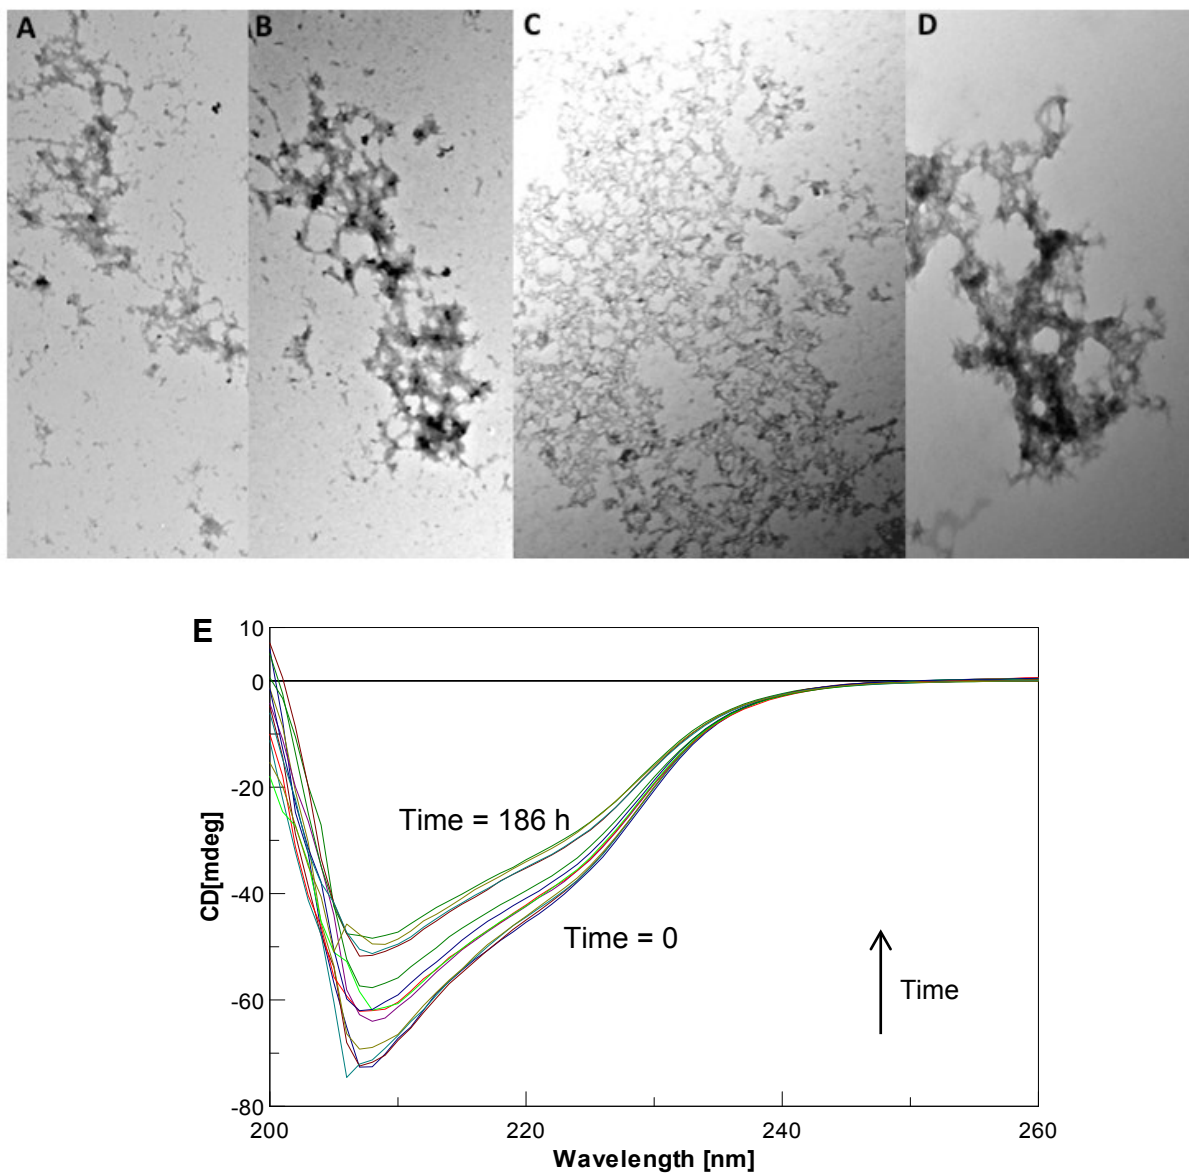

**Figure SI10** - Aged M11<sub>53-149</sub>: amorphous aggregates (panels A-D) - CD spectra of M11<sub>53-149</sub> incubated at 298K recorded every 12 hours for 186 days (panel E).

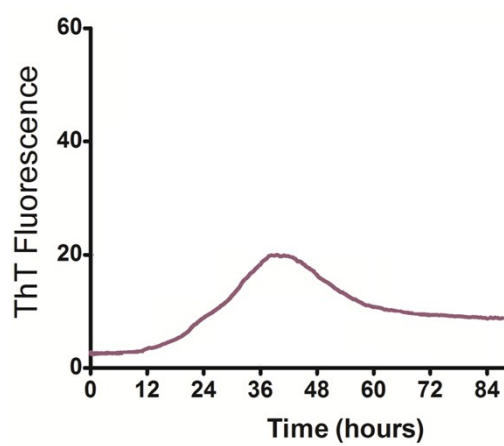

**FIGURE SI11** - Aggregation behavior of M11<sub>53-149</sub> at 300  $\mu$ M and 298K followed by Thioflavin T fluorescence.
